# Supplementary material
Source: PubMed Central journal article supplement (PMC6364977)
Supplement: NIHMS984353-supplement-Supp_FigS1.pdf [file NIHMS984353-supplement-Supp_FigS1.pdf]

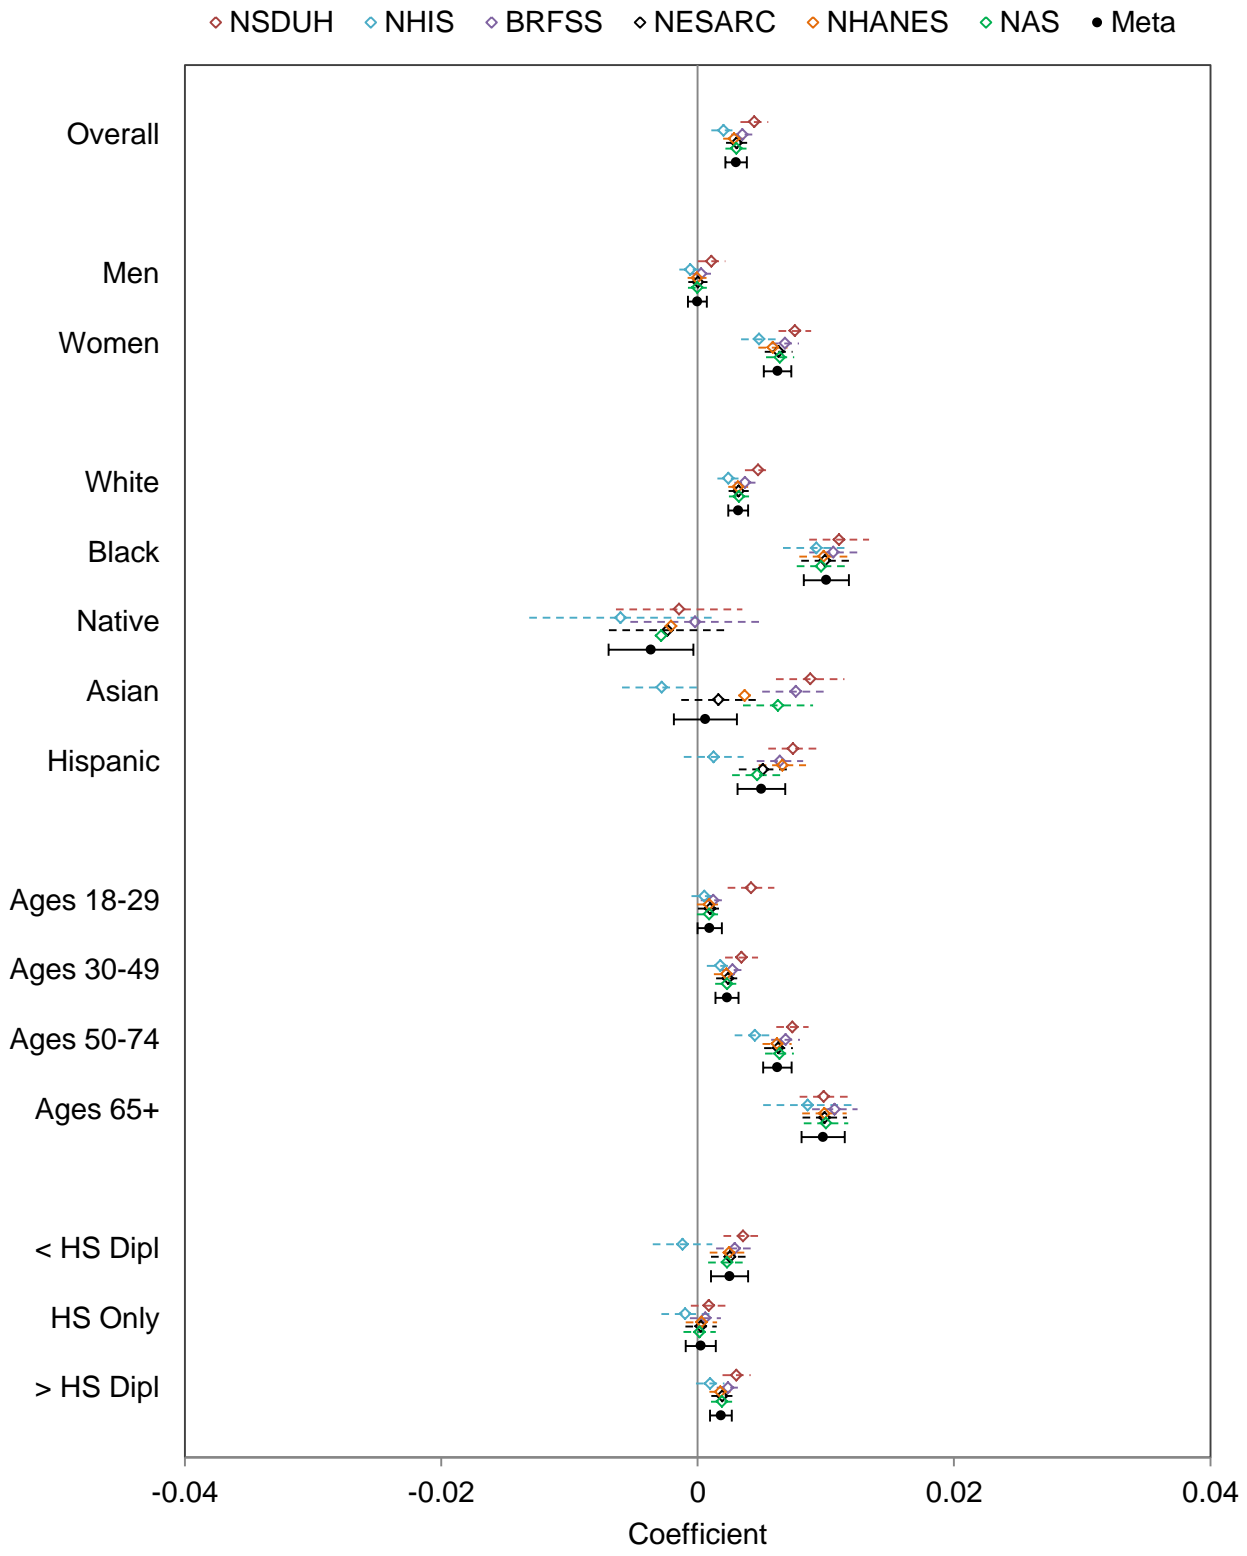

Supplementary Figure 1: Results of sensitivity analyses in which each of the 6 survey series were omitted one at a time from the meta-analysis of drinking prevalence. “Meta” refers to the original meta-analytical result for all six series.
