# Supplementary material
Source: PubMed Central journal article supplement (PMC6364977)
Supplement: NIHMS984353-supplement-Supp_FigS2.pdf [file NIHMS984353-supplement-Supp_FigS2.pdf]

◇ NSDUH   ◇ NHIS   ◇ BRFSS   ◇ NESARC   ◇ NHANES   ◇ NAS   • Meta

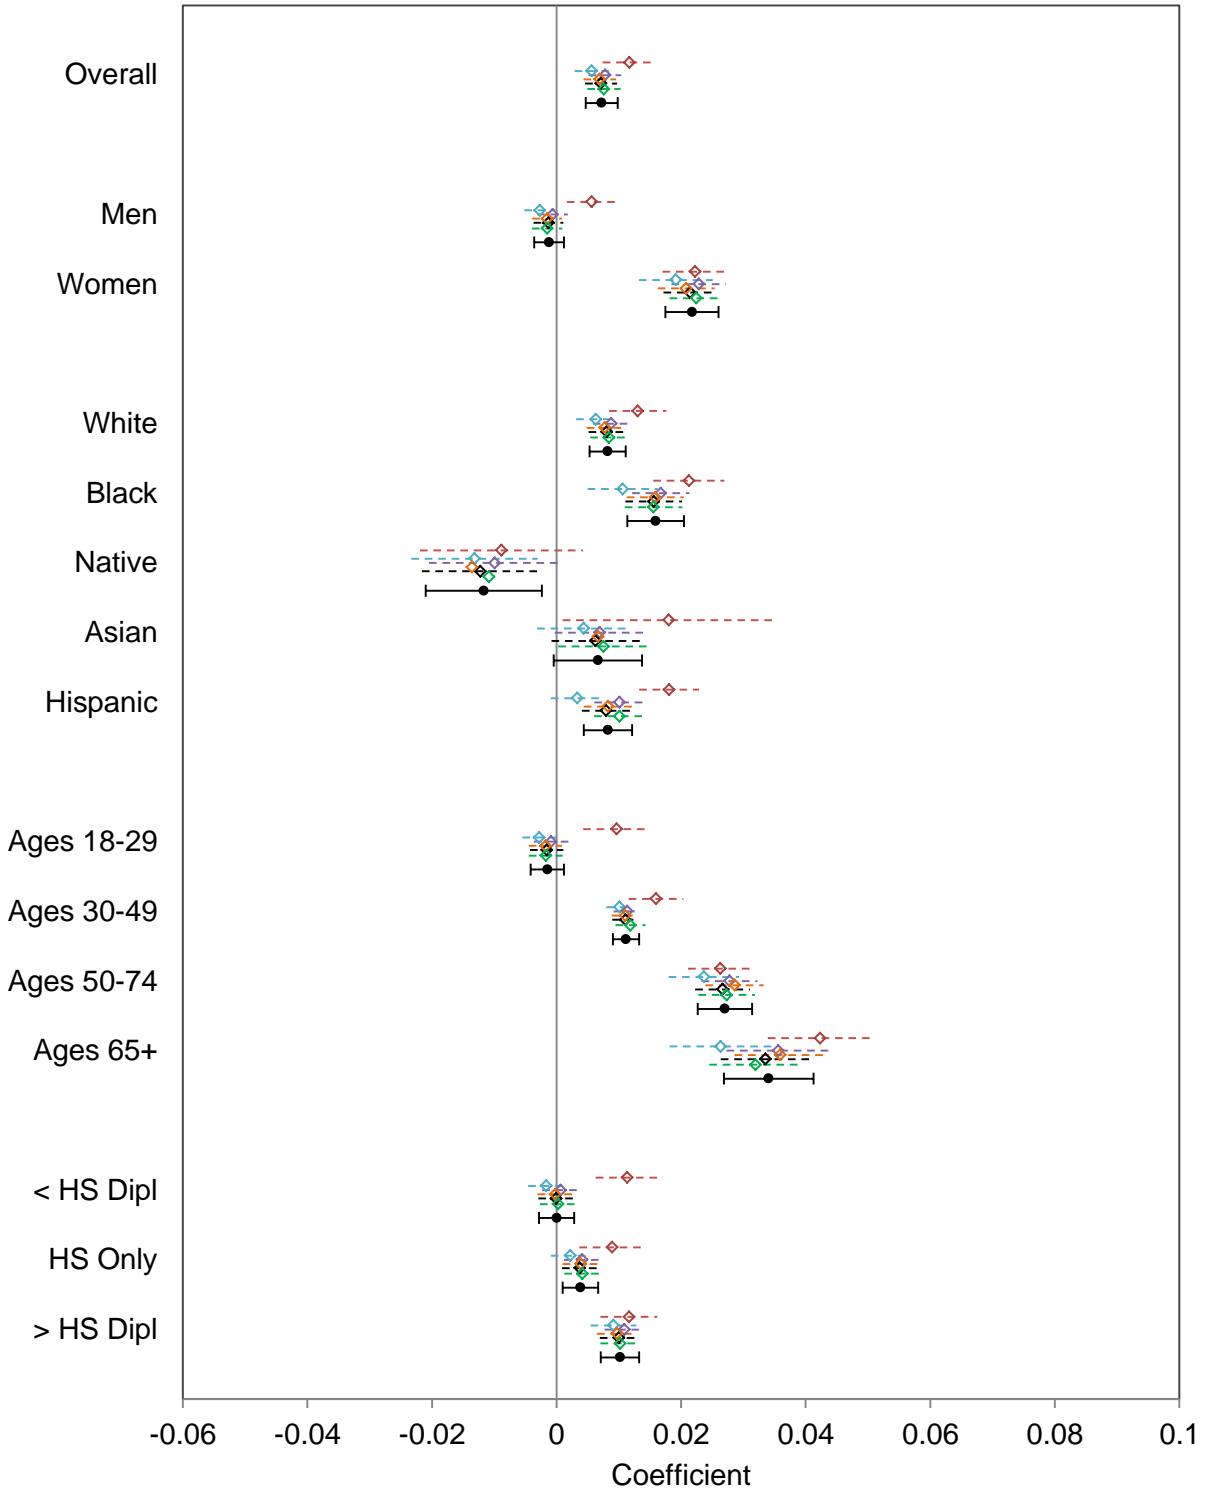

Supplementary Figure 2: Results of sensitivity analyses in which each of the 6 survey series were omitted one at a time from the meta-analysis of binge drinking prevalence. “Meta” refers to the original meta-analytical result for all six series.
